# Supplementary material for: Scissor Bite in Growing Patients: Case Report Treated with Clear Aligners
Source: MDPI journal article supplement (doi:10.3390/children10040624), 2023-03-27
Supplement: s1 [file s1]

## Supplementary materials

**Table S1.** Different conventional approach to treat SB in growing patients, according to literature review.

| Author and year of publication | Title                                                                                                            | Sample                                                                                                                             | Etiology                                                                                       | Treatment                                                                                                                                                                                                                                                                                                                            | Conclusion                                                                                                                                                                                                          |
|--------------------------------|------------------------------------------------------------------------------------------------------------------|------------------------------------------------------------------------------------------------------------------------------------|------------------------------------------------------------------------------------------------|--------------------------------------------------------------------------------------------------------------------------------------------------------------------------------------------------------------------------------------------------------------------------------------------------------------------------------------|---------------------------------------------------------------------------------------------------------------------------------------------------------------------------------------------------------------------|
| King J. et al, 2004 [20]       | "Unilateral Brodie bite treated with distraction osteogenesis"                                                   | ♀ 11Y and 10M<br>SB- left side (24,25,26/34,35,36)<br><b>Other associated problems:</b><br>Convex profile without facial asymmetry | SB- skeletal (mandible)<br>Right molar and canine Class I<br>Skeletal Class II, hyperdivergent | <b>Maxilla:</b> fixed appliance + full coverage maxillary appliance<br><b>Mandible:</b> fixed appliance + medial symphysis distraction osteogenesis with hybrid distractor<br><b>Total treatment time:</b> 2Y and 2M<br><b>Retainer:</b> Hawley's removable<br><b>Control:</b> 1Y and 6 M, minimal skeletal relapse post-distraction | Distraction osteogenesis has shown to be minimally invasive, comfortable, predictable, and affordable.                                                                                                              |
| Yun S. et al, 2007 [19]        | "Scissors-bite correction on second molar with a dragon helix appliance"                                         | ♀ 16Y<br>SB- left side (27/37)<br><b>Other associated problems:</b><br>Convex profile                                              | SB- dental<br>Bilateral Class II<br>Skeletal Class I                                           | <b>Maxilla:</b> 1 mini-screw (MS) between 25 and 26 connected through stainless steel wire to 26B + dragon helix spring (1 arm 27O, 1 arm 26B)<br><b>Mandible:</b> 1MS between 35 and 36 connected to 36B + bracket per lingual of 37 with elastic bands<br><b>SB Correction:</b> 10M                                                | A spring dragon helix combined with indirect skeletal anchorage was used to successfully treat a SB.                                                                                                                |
| Nojima K. et al, 2010 [2]      | "A case report of Bilateral Brodie Bite in Early Mixed Dentition Using Bonded Constriction Quad-helix Appliance" | ♂ 9Y and 2M<br>SB- bilateral posterior<br><b>Other associated problems:</b><br>Convex profile and mandibular retrognathism         | SB-skeletal (maxilla and mandible)<br>Bilateral molar Class II<br>Skeletal Class II            | <b>Maxilla:</b> quad-helix appliance (constriction) with resin on O-face of 16,55,54,64,65,26<br><b>Mandible:</b> bi-helix appliance on 36 and 46 (expansion)<br><b>Total treatment time:</b> 2Y and 6M<br><b>SB Correction:</b> 5M                                                                                                  | Treatment of bilateral SB in the mixed dentition with a quad helix appliance provided an effective reduction in maxillary width, providing good results in a short period of time and without patient's cooperation |

| Author and year of publication | Title                                                                                                      | Sample                                                                                                                   | Etiology                                                                                                                                                                                                                                                                                                                   | Treatment                                                                                                                                                                                                                                                                                                                  | Conclusion                                                                                                                                                                             |
|--------------------------------|------------------------------------------------------------------------------------------------------------|--------------------------------------------------------------------------------------------------------------------------|----------------------------------------------------------------------------------------------------------------------------------------------------------------------------------------------------------------------------------------------------------------------------------------------------------------------------|----------------------------------------------------------------------------------------------------------------------------------------------------------------------------------------------------------------------------------------------------------------------------------------------------------------------------|----------------------------------------------------------------------------------------------------------------------------------------------------------------------------------------|
| Pinho T.,2011 [1]              | "Early treatment of scissor bite"                                                                          | <b>Case 1:</b> ♂ 6Y SB- right side (54,55,16/84,85,46) Hypodivergent                                                     | <b>Case 1:</b> SB- Dental, compressed mandible<br>Right molar Class III<br>Left molar Class I                                                                                                                                                                                                                              | <b>Case 1: <u>Mandible:</u></b> cemented expansion appliance with bite plate<br><b><u>Retainer:</u></b> same expander for 1 month<br><b><u>SB correction:</u></b> 4M<br><b><u>Control:</u></b> 6M, no relapse                                                                                                              | Mandibular dental expansion appliance with bite plates and intra and inter arch elastics as an effective combination.<br>Anterior bite plate and elastics as an effective combination. |
|                                |                                                                                                            | <b>Case 2:</b> ♂ 8Y SB-right side (54,55,16/84,85,46) Hypodivergent                                                      | <b>Case 2: <u>Maxilla:</u></b> crossed elastics between 16 and 55 and mandibular expander + intra-arch elastics between 16 and 26 and 55 and 65<br><b><u>Mandible:</u></b> cemented expansion appliance with bite plate + resin on 46 O and B<br><b><u>SB Correction:</u></b> 8M<br><b><u>Control:</u></b> 1Y, no relapses | <b>Case 2:</b> ♂ 8Y SB-right side (54,55,16/84,85,46) Hypodivergent                                                                                                                                                                                                                                                        |                                                                                                                                                                                        |
|                                |                                                                                                            | <b>Case 3:</b> ♂ 12Y SB- left side (26/36) Hypodivergent                                                                 | <b>Case 3: <u>Maxilla:</u></b> Cross elastics used between 26 and 36.<br><b><u>Mandible:</u></b> lingual arch with bite plate except 36.<br><b><u>SB correction:</u></b> 3M<br><b><u>Control:</u></b> 3M, no relapse                                                                                                       | <b>Case 3:</b> ♂ 12Y SB- left side (26/36) Hypodivergent                                                                                                                                                                                                                                                                   |                                                                                                                                                                                        |
|                                |                                                                                                            | <b>Case 4:</b> ♀ 11Y SB- right side (14,15/44,45) Hypodivergent                                                          | <b>Case 4: <u>Maxilla:</u></b> bite-tubes in palatal of 11 and 21 + crossed elastic between 14 and 44<br><b><u>Mandible:</u></b> resin per occlusal and buccal of 44<br><b><u>Total treatment time:</u></b> 8M<br><b><u>Retainer:</u></b> bite tubes until eruption of the second molars                                   | <b>Case 4:</b> ♀ 11Y SB- right side (14,15/44,45) Hypodivergent                                                                                                                                                                                                                                                            |                                                                                                                                                                                        |
| Hua X. et al, 2012 [14]        | "Correction of a dental arch-width and asymmetric discrepancy with a slow maxillary contraction appliance" | ♂ 12Y and 3M SB- right side (14,15,16/44,45,46)<br><b>Other associated problems:</b> Convex profile and facial asymmetry | SB- skeletal (maxilla) Bilateral Molar Class III<br>Bilateral Canine Class I Skeletal Class I                                                                                                                                                                                                                              | <b><u>Maxilla:</u></b> slow maxillary contraction removable appliance<br><b><u>Total treatment time:</u></b> 17M<br><b><u>SB Correction:</u></b> 7M<br><b><u>Retainer:</u></b> 1- the same appliance without the screw (5 months). 2- Hawley removable for maxilla and mandible<br><b><u>Control:</u></b> 37M, no relapses | Slow maxillary contraction is an inexpensive and effective way to treat transverse maxillary asymmetry.                                                                                |

15  
16  
17  
18  
19  
20  
21  
22  
23  
24  
25

| Author and year of publication  | Title                                                                                                      | Sample                                                                                                                                   | Etiology                                                                          | Treatment                                                                                                                                                                                                                                                                                                                                                                 | Conclusion                                                                                                                        |
|---------------------------------|------------------------------------------------------------------------------------------------------------|------------------------------------------------------------------------------------------------------------------------------------------|-----------------------------------------------------------------------------------|---------------------------------------------------------------------------------------------------------------------------------------------------------------------------------------------------------------------------------------------------------------------------------------------------------------------------------------------------------------------------|-----------------------------------------------------------------------------------------------------------------------------------|
| Chandorikar H. et al, 2017 [15] | "Early correction of unilateral scissor bite using transforce appliance and modified twin block appliance" | ♂ 9Y<br>SB- right side (54,55,16/84,85, 46)<br><b>Other associated problems:</b> Straight profile, functional deviation to the left side | SB-dental<br>Left molar Class I<br>Bilateral canine Class III<br>Skeletal Class I | <b>Maxilla:</b> anterior bite plate<br><b>Mandible:</b> 28 mm lingual transforce appliance, size 2<br><b>Total treatment time:</b> 3Y and 6M<br><b>SB Correction:</b> 5M<br><b>Retainer:</b> lower lingual retainer + wraparound to the maxilla<br><b>Control:</b> 2Y, no relapse                                                                                         | This early treatment approach can give predictable results with less patient dependence and discomfort.                           |
| Lee K. et al, 2020 [16]         | "Scissor Bite Correction with TADs"                                                                        | ♀ 16Y<br>SB-right side (16.17/46.47)<br><b>Other associated problems:</b> Convex profile without facial asymmetry.                       | SB- dental<br>Left and right Class II<br>Skeletal Class I                         | <b>Maxilla:</b> fixed appliance with 2 MS in the midpalatal area and TPA + occlusal ramp on 26 and 15<br><b>Mandible:</b> fixed appliance with 2 MS (1 in B between 45 and 46, 1 by DB of 47)<br><b>Total treatment time:</b> 2Y and 5M<br><b>SB Correction:</b> 2Y<br><b>Retainer:</b> fixed lingual retainers in maxilla and mandible<br><b>Control:</b> 6M, no relapse | MS can be used to successfully correct the SB.                                                                                    |
| Agrawal A., 2020 [6]            | "Brodie Bite: A Clinical Challenge"                                                                        | ♂ 13Y<br>SB- bilateral posterior<br><b>Other associated problems:</b> Convex profile                                                     | SB-skeletal (mandible)<br>Bilateral Class II<br>Skeletal Class II                 | <b>Maxilla:</b> preadjusted edgewise appliance (initial phase) + Herbst appliance<br><b>Mandible:</b> edgewise fixed appliance + Herbst appliance + lingual arch to the second molars<br><b>Total treatment time:</b> 22M<br><b>Retainer:</b> permanent lingual adhesives on the mandible and invisible on the upper arch                                                 | The Herbst appliance successfully corrected the SB with the advantages of reduced time and not needing the patient's cooperation. |

**Legend:** SB- Scissor bite; Y- years; M- months; MS- mini-screw; B- buccal; O- occlusal; TPA- transpalatal arch; DB- distobuccal;

26  
27  
28  
29  
30  
31  
32
